# Supplementary material
Source: Springer Nature journal article supplement (https://www.springermedizin.de/resource/supplementary/12883_2012_776_MOESM1_ESM.pdf/9456240)

**A**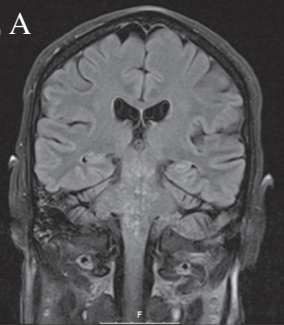**B**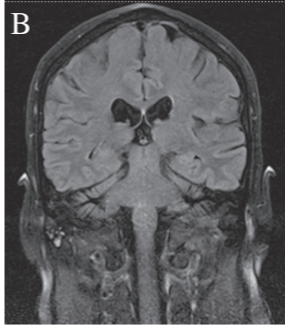

Supplement: MOESM1 [file 9456240]
